# Supplementary material for: Protective Effects of Plathymenia reticulata and Connarus favosus Aqueous Extracts against Cadmium- and Mercury-Induced Toxicities
Source: PubMed Central journal article supplement — Toxicol Res. 2018 Jan 15;35(1):25–35. doi: 10.5487/TR.2019.35.1.025 (PMC6354948; doi:10.5487/tr.2019.35.1.025), 2018-01-15
Supplement: tr-34-025_suppl.pdf [file tr-34-025_suppl.pdf]

**Supplementary Table 1.** Gene-specific primers used for real time RT-PCR assays in yeast

| Gene | Accession #    | Direction      | Sequence                   | Position of primers |
|------|----------------|----------------|----------------------------|---------------------|
| RNR3 | NM_001179416.1 | Forward primer | 5'-ATATGGCTGCTGATCGTGCC-3' | 2090-2109           |
|      |                | Reverse primer | 5'-TCGTAAGCGCAGATGCCGC-3'  | 2390-2371           |
| GSH1 | NM_001181534.1 | Forward primer | 5'-GCCACTGGACTATGATCTTG-3' | 1200-1219           |
|      |                | Reverse primer | 5'-CACGGAATACGCAGCGTTCT-3' | 1464-1445           |
| KAR2 | NM_001181468.1 | Forward primer | 5'-CCAGCCAAATGTCCACCCG-3'  | 959-977             |
|      |                | Reverse primer | 5'-GCTGCACCGTATGCAACAGC-3' | 1256-1237           |
| PRX1 | NM_001178304.1 | Forward primer | 5'-TTGCCACAGCACCTATTCTG-3' | 92-111              |
|      |                | Reverse primer | 5'-CGTGGGACTCAACATCTTCC-3' | 370-351             |

**Supplementary Table 2.** Role, accession numbers and specific primer pairs used for the RT-qPCR analysis in zebrafish

| Function                                        | Gene           | Accession number | Primer (5'-3')                                                       |
|-------------------------------------------------|----------------|------------------|----------------------------------------------------------------------|
| Cytoskeleton support                            | <i>β-Actin</i> | NM_131031        | <sup>a</sup> AAGTGCACGTGGACA<br><sup>b</sup> GTTTAGGTTGGTCGTTTCGTTGA |
| Ion homeostasis and heavy metals detoxification | <i>mt2</i>     | AY305851         | <sup>a</sup> TGCCAATGCCCAAGAC<br><sup>b</sup> GCCCTTACACACGCACG      |
| Response to oxidative stress                    | <i>sod1</i>    | BC055516         | <sup>a</sup> TGAGACACGTCCGAGACC<br><sup>b</sup> TGCCGATCACTCCACAGG   |
| Neurotransmission                               | <i>ache</i>    | NM_131846        | <sup>a</sup> CCCGACTGGTAATCC<br><sup>b</sup> GTAAAGCAGACGAGGC        |

<sup>a</sup>Forward primer; <sup>b</sup>Reverse primer.

**Supplementary Table 3.** Total mercury concentration in the brain, the liver and the muscle of fish fed with different diets during 60 days. Total mercury levels are expressed as µg Hg/g f.w. (mean ± SD, n = 3)

|        | Control                  | <i>P. reticulata</i> <sup>a</sup> | <i>P. reticulata</i> + MeHg <sup>b</sup> | <i>C. favosus</i> <sup>a</sup> | <i>C. favosus</i> + MeHg <sup>b</sup> | MeHg <sup>c</sup> |
|--------|--------------------------|-----------------------------------|------------------------------------------|--------------------------------|---------------------------------------|-------------------|
| Brain  | 0.08 ± 0.03 <sup>□</sup> | 0.07 ± 0.02 <sup>□</sup>          | 18.9 ± 2.28*                             | 0.12 ± 0.04 <sup>□</sup>       | 18.4 ± 0.57*                          | 17.2 ± 1.68*      |
| Liver  | 0.08 ± 0.01 <sup>□</sup> | 0.09 ± 0.04 <sup>□</sup>          | 10.2 ± 1.70* <sup>□</sup>                | 0.09 ± 0.03 <sup>□</sup>       | 16.5 ± 1.04*                          | 20.4 ± 4.64*      |
| Muscle | 0.14 ± 0.03 <sup>□</sup> | 0.12 ± 0.02 <sup>□</sup>          | 8.62 ± 0.63*                             | 0.13 ± 0.01 <sup>□</sup>       | 8.18 ± 0.86*                          | 8.96 ± 0.50*      |

<sup>a</sup>Food supplemented by 0.5% of either the plant extract of *P. reticulata* or that of *C. favosus*.

<sup>b</sup>Food containing 0.5% of either the plant extract of *P. reticulata* or that of *C. favosus* and 13.5 µg MeHg/g (f.w.).

<sup>c</sup>Fish fed with MeHg contaminated food (13.5 µg MeHg/g f.w.).

\*Significant accumulation as compared to the control condition (\**p* < 0.05).

<sup>□</sup>Significantly different from the MeHg condition (<sup>□</sup>*p* < 0.05).

**Supplementary Table 4.** Levels of TBARS measured in the tissues of fish fed with different diets during 60 days. The data corresponds to the concentrations expressed as nmol of TBARS/mg of proteins (mean ± SD; n = 3)

|        | Control                  | <i>P. reticulata</i> <sup>a</sup> | <i>P. reticulata</i> + MeHg <sup>b</sup> | <i>C. favosus</i> <sup>a</sup> | <i>C. favosus</i> + MeHg <sup>b</sup> | MeHg <sup>c</sup> |
|--------|--------------------------|-----------------------------------|------------------------------------------|--------------------------------|---------------------------------------|-------------------|
| Brain  | 0.92 ± 0.07 <sup>□</sup> | 1.09 ± 0.12 <sup>□</sup>          | 1.05 ± 0.15 <sup>□</sup>                 | 1.02 ± 0.16 <sup>□</sup>       | 0.99 ± 0.20 <sup>□</sup>              | 1.32 ± 0.02*      |
| Liver  | 1.57 ± 0.09 <sup>□</sup> | 1.11 ± 0.02* <sup>□</sup>         | 1.35 ± 0.12* <sup>□</sup>                | 1.03 ± 0.04* <sup>□</sup>      | 1.14 ± 0.07* <sup>□</sup>             | 4.71 ± 0.55*      |
| Muscle | 0.80 ± 0.06              | 0.85 ± 0.12                       | 0.97 ± 0.36                              | 0.87 ± 0.14                    | 0.73 ± 0.08                           | 0.87 ± 0.37       |

<sup>a</sup>Food supplemented by 0.5% of either the plant extract of *P. reticulata* or that of *C. favosus*.

<sup>b</sup>Food containing 0.5% of either the plant extract of *P. reticulata* or that of *C. favosus* and 13.5 µg MeHg/g (f.w.).

<sup>c</sup>Fish fed with MeHg contaminated food (13.5 µg MeHg/g f.w.).

\*Significant accumulation as compared to the control condition (\**p* < 0.05). <sup>□</sup>Significantly different from the MeHg condition (<sup>□</sup>*p* < 0.05).

**Supplementary Table 5.** Values measured for the initial specific activity of the AChE in the tissues of fish fed with different diets during 60 days. Values are expressed as nmol of substrate hydrolyzed/mg of protein/min (mean  $\pm$  SD;  $n = 3$ )

|        | Control                   | <i>P. reticulata</i> <sup>a</sup> | <i>P. reticulata</i> + MeHg <sup>b</sup> | <i>C. favosus</i> <sup>a</sup> | <i>C. favosus</i> + MeHg <sup>b</sup> | MeHg <sup>c</sup> |
|--------|---------------------------|-----------------------------------|------------------------------------------|--------------------------------|---------------------------------------|-------------------|
| Brain  | 789 $\pm$ 13 <sup>□</sup> | 997 $\pm$ 120* <sup>□</sup>       | 1182 $\pm$ 114* <sup>□</sup>             | 847 $\pm$ 44 <sup>□</sup>      | 790 $\pm$ 48                          | 677 $\pm$ 64*     |
| Muscle | 391 $\pm$ 46 <sup>□</sup> | 525 $\pm$ 23* <sup>□</sup>        | 663 $\pm$ 121* <sup>□</sup>              | 548 $\pm$ 54* <sup>□</sup>     | 453 $\pm$ 74 <sup>□</sup>             | 252 $\pm$ 21*     |

<sup>a</sup>Food supplemented by 0.5% of either the plant extract of *P. reticulata* or that of *C. favosus*.

<sup>b</sup>Food containing 0.5% of either the plant extract of *P. reticulata* or that of *C. favosus* and 13.5  $\mu$ g MeHg/g (f.w.).

<sup>c</sup>Fish fed with MeHg contaminated food (13.5  $\mu$ g MeHg/g f.w.).

\*Significant accumulation as compared to the control condition (\* $p < 0.05$ ). <sup>□</sup>Significantly different from the MeHg condition (<sup>□</sup> $p < 0.05$ ).

**Supplementary Table 6.** Differential genes expression<sup>a</sup> reported in the brain, the liver and the skeletal muscle of zebrafish fed with different diets during 60 days as compared to the control condition

|                        | <i>P. reticulata</i> <sup>a</sup> | <i>P. reticulata</i> + MeHg <sup>b</sup> | <i>C. favosus</i> <sup>a</sup> | <i>C. favosus</i> + MeHg <sup>b</sup> | MeHg <sup>d</sup> |
|------------------------|-----------------------------------|------------------------------------------|--------------------------------|---------------------------------------|-------------------|
| <b>Brain</b>           |                                   |                                          |                                |                                       |                   |
| <i>mt2</i>             | =                                 | 4                                        | =                              | =                                     | 1/9               |
| <i>sod1</i>            | =                                 | 19                                       | =                              | 22                                    | 28                |
| <i>ache</i>            | =                                 | 14                                       | =                              | 5                                     | =                 |
| <b>Liver</b>           |                                   |                                          |                                |                                       |                   |
| <i>mt2</i>             | =                                 | 24                                       | =                              | 14                                    | 1/4               |
| <i>sod1</i>            | =                                 | =                                        | =                              | =                                     | 1/14              |
| <b>Skeletal muscle</b> |                                   |                                          |                                |                                       |                   |
| <i>mt2</i>             | =                                 | 4                                        | =                              | =                                     | 1/5               |
| <i>sod1</i>            | =                                 | =                                        | =                              | =                                     | 1/3               |
| <i>ache</i>            | =                                 | =                                        | =                              | =                                     | 1/5               |

<sup>a</sup>The differential expression reported correspond to the significant change of the relative gene expression in a test condition as compared to the control condition. It was calculated by dividing the relative expression of the considered gene in the test condition by its level of expression in the control condition (without extract, without MeHg).

= indicates a lack of significant change of the relative gene expression in a test condition as compared to the control condition.

<sup>b</sup>Food supplemented by 0.5% of either the plant extract of *P. reticulata* or that of *C. favosus*.

<sup>c</sup>Food containing 0.5% of either the plant extract of *P. reticulata* or that of *C. favosus* and 13.5  $\mu$ g MeHg/g (f.w.).

<sup>d</sup>Fish fed with MeHg contaminated food (13.5  $\mu$ g MeHg/g f.w.).
